# Supplementary material for: Comprehensive in situ mapping of human cortical transcriptomic cell types
Source: PubMed Central journal article supplement (PMC8384853; doi:10.1038/s42003-021-02517-z), 2021-08-24
Supplement: 42003_2021_2517_MOESM2_ESM.pdf [file 42003_2021_2517_MOESM2_ESM.pdf]

## Description of Additional Supplementary files

**File name:** Supplementary Data 1

**Description:** Cell metadata for the three tissue sections containing cell number, X coordinate, Y coordinate, annotated subtype, cell type probability, plot color, layer annotation, subclass, class, section.
